# Supplementary material for: A novel temporary immersion bioreactor system for large scale multiplication of banana (Rasthali AAB—Silk)
Source: PubMed Central journal article supplement (PMC8514489; doi:10.1038/s41598-021-99923-4), 2021-10-13
Supplement: 41598_2021_99923_MOESM1_ESM.pdf [file 41598_2021_99923_MOESM1_ESM.pdf]

## **A novel temporary immersion bioreactor system for large scale multiplication of banana (Rasthali AAB - Silk)**

Subbaraya Uma<sup>#1\*</sup>, Raju Karthic<sup>#2</sup>, Sathiamoorthy Kalpana<sup>2</sup>, Suthanthiram Backiyarani<sup>2</sup>, and Marimuthu Somasundaram Saraswathi<sup>2</sup>

Authors' affiliation:

<sup>1</sup>Director, ICAR-National Research Centre for Banana, Thogamalai Main Road, Thayanur Post, Tiruchirappalli, 620 102, Tamil Nadu, India

<sup>2</sup>Bioreactor Facility, Crop Improvement Division, ICAR-National Research Centre for Banana, Thayanur - 620 102, Tiruchirappalli-District, Tamilnadu. India.

\*Corresponding author Email: [umabinit@yahoo.co.in](mailto:umabinit@yahoo.co.in)

# these author contributed equally to this work

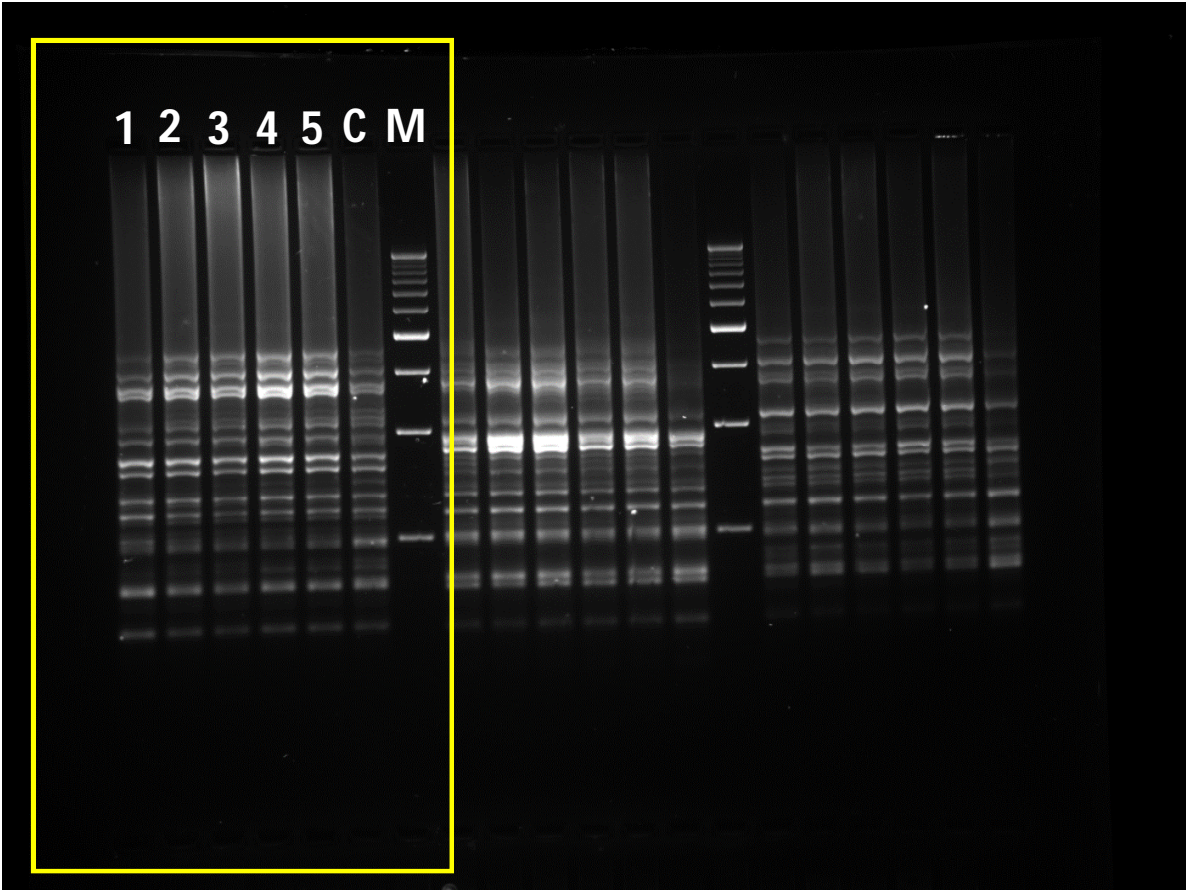

**Highlighted area is for Rasthali**
